# Supplementary material
Source: HighWire-hosted journal article supplement (https://www.cmaj.ca/highwire/filestream/58936/field_highwire_adjunct_files/0/case-tan-1-at.pdf)
Supplement: case-tan-1-at.pdf [file case-tan-1-at.pdf]

**Appendix 1 (as supplied by the authors): Spirochetal infections and other tick-borne febrile illnesses in Canada<sup>a</sup>**

|                         | <b>*Tick Borne Relapsing Fever<sup>1,2</sup></b>      | <b>*Louse Borne Relapsing Fever<sup>3</sup></b> | <b>Leptospirosis<sup>4,5</sup></b>                                | <b>Lyme disease<sup>6,7</sup></b>                                                                    | <b>Rocky Mountain Spotted Fever<sup>8,9</sup></b>                 |
|-------------------------|-------------------------------------------------------|-------------------------------------------------|-------------------------------------------------------------------|------------------------------------------------------------------------------------------------------|-------------------------------------------------------------------|
| <b>Causative agent</b>  | <i>Borrelia hermsii</i>                               | <i>Borrelia recurrentis</i>                     | <i>Leptospira</i> spp. (eg. <i>L. interrogans</i> )               | <i>Borrelia burgdorferi</i>                                                                          | <i>Rickettsia rickettsii</i>                                      |
| <b>Arthropod vector</b> | Ornithodoros spp. ticks (Argasid ticks, “soft ticks”) | <i>Pediculus humanus</i> (human body louse)     | None                                                              | Ixodes ticks (scapularis on East coast, pacificus on West coast)                                     | <i>Dermacentor andersoni</i> (Rocky Mountain Wood Tick) in Canada |
| <b>Animal reservoir</b> | Small mammals: mice, rats, squirrels, chipmunks       | None                                            | Rodents, small mammals. Can also infect livestock, dogs and cats. | East coast: White-footed mice, chipmunks, white-tailed deer.<br><br>West coast: deer mice, wood rats | None                                                              |

Appendix to: Hussein H, Showler A, Tan DHS. Canadian “cabin fever”: tick-borne relapsing fever in pregnancy. *CMAJ* 2013; DOI:10.1503/cmaj.122053.

Copyright © 2014 The Author(s) or their employer(s).

To receive this resource in an accessible format, please contact us at [cmajgroup@cmaj.ca](mailto:cmajgroup@cmaj.ca)

|                                                                                                              |                                                                                                                                      |                                                                                                                                |                                                                                                                                                                                                                                                                                                                                                       |                                                                                                                                                                                                        |                                                                                                                                                                                      |
|--------------------------------------------------------------------------------------------------------------|--------------------------------------------------------------------------------------------------------------------------------------|--------------------------------------------------------------------------------------------------------------------------------|-------------------------------------------------------------------------------------------------------------------------------------------------------------------------------------------------------------------------------------------------------------------------------------------------------------------------------------------------------|--------------------------------------------------------------------------------------------------------------------------------------------------------------------------------------------------------|--------------------------------------------------------------------------------------------------------------------------------------------------------------------------------------|
| <p><b>Geographic distribution in Canada</b></p> <p><b>and</b></p> <p><b>risk factors for acquisition</b></p> | <p>Southern British Columbia</p> <p>Exposure to rustic housing with rodent infestations</p>                                          | <p>No North American outbreaks since 19<sup>th</sup> century.</p> <p>Occurs in epidemics in populations with poor hygiene.</p> | <p>Limited data in Canada.</p> <p>Few cases associated with direct occupational exposure to urine of infected animals: veterinarians, butchers, hunters, any animal handlers.</p> <p>Cases in returning travellers from tropical and subtropical areas with indirect exposure to wet soil or water, often following floods or fresh-water sports.</p> | <p>Southern parts of Quebec, New Brunswick, Nova Scotia, Ontario, Manitoba and British Columbia</p> <p>Exposure to wooded areas, periurban areas.</p> <p>Occasional transmission in urban centers.</p> | <p>Southeastern Alberta, Southwestern Saskatchewan, Southern British Columbia</p> <p>Exposure to wooded areas, periurban areas.</p> <p>Occasional transmission in urban centers.</p> |
| <p><b>Clinical clues</b></p>                                                                                 | <p>Recurrent paroxysmal fever associated with nausea, myalgias, and headache with asymptomatic periods between febrile episodes.</p> | <p>Similar to TBRF but longer fever episodes. Typically 1 relapse only. More likely to have hemorrhagic complications.</p>     | <p>Fever, myalgias (calves, low back), headache, conjunctival suffusion</p> <p>Weil's disease – hepatorenal failure, hemorrhage, pneumonitis</p>                                                                                                                                                                                                      | <p>Early infection:</p> <p>Erythema migrans rash, malaise, fever, fatigue, myalgias.</p> <p>Can present with arthralgias, heart block, and neurologic symptoms including bell's palsy.</p>             | <p>Fever, headache.</p> <p>Maculopapular rash beginning on wrists and ankles, spreading to palms and soles and then to entire body.</p>                                              |

|                                   |                                                                                                                                                                  |                                                                                                                                                                           |                                                                                                 |                                                                                                                                                        |                                                                                                                                                                           |
|-----------------------------------|------------------------------------------------------------------------------------------------------------------------------------------------------------------|---------------------------------------------------------------------------------------------------------------------------------------------------------------------------|-------------------------------------------------------------------------------------------------|--------------------------------------------------------------------------------------------------------------------------------------------------------|---------------------------------------------------------------------------------------------------------------------------------------------------------------------------|
| <b>Diagnostic tests of choice</b> | Peripheral blood smear during febrile episode (spirochetes observed on light microscopy using Wright-Giemsa stain or dark field microscopy).<br><br>Borrelia PCR | Peripheral blood smear during febrile episode (numerous spirochetes observed on light microscopy using Wright-Giemsa stain or dark field microscopy).<br><br>Borrelia PCR | Leptospira PCR (blood, urine)<br><br>Serology is test of choice but not useful in early disease | Epidemiologic history and clinical presentation are mainstay of diagnosis. Serology (ELISA followed by Western blot) helpful in certain circumstances. | Skin biopsy examination with direct immunofluorescence<br><br>PCR for <i>R. rickettsii</i> on blood or skin biopsy.<br><br>Serologic testing not helpful in early disease |
|-----------------------------------|------------------------------------------------------------------------------------------------------------------------------------------------------------------|---------------------------------------------------------------------------------------------------------------------------------------------------------------------------|-------------------------------------------------------------------------------------------------|--------------------------------------------------------------------------------------------------------------------------------------------------------|---------------------------------------------------------------------------------------------------------------------------------------------------------------------------|

<sup>a</sup> Excluding *Treponema pallidum*, the causative agent of syphilis

\* Organisms can be observed under light microscopy using a Wright-Giemsa stain

<sup>1</sup> Center for Disease Control and Prevention. Tick-borne relapsing fever: information for clinicians [homepage on the internet].

C2012 [updated 2012 Mar 13; cited 2012 Dec 7]. Available from: <http://www.cdc.gov/relapsing-fever/clinicians/>

<sup>2</sup> Dworkin MS, Schwan TG, Anderson DE Jr. Tick-borne relapsing fever in North America. *Med Clin North Am* 2002;86:417–

33, viii–ix

<sup>3</sup> Raoult D, Roux V. The Body Louse as a Vector of Reemerging Human Diseases. *Clin Infect Dis* 1999;29:888-911

<sup>4</sup> Brown K, Prescott J. Leptospirosis in the Family Dog: a public health perspective. *CMAJ* 2008;178(4):399-401

<sup>5</sup> Mandell GL, Bennett JE, Dolin R. Mandell, Douglas, and Bennett's Principles and Practice of Infectious Disease. 7<sup>th</sup> ed.

Philadelphia: Churchill Livingstone; 2009.

<sup>6</sup> Ogden NH, Lindsay LR, Morshed M, et al. The emergence of Lyme disease in Canada. *CMAJ* 2009;180(12):1221-1224

<sup>7</sup> Wormser GP, Raymond RJ, Shapiro ED, et al. The Clinical Assessment, Treatment and Prevention of Lyme Disease, Human

Granulocytic Anaplasmosis, and Babesiosis: Clinical Practice Guidelines by the Infectious Diseases Society of America. *Clin Infect Dis* 2006;43:1089-134

---

<sup>8</sup> Alberta Health. Public Health Notifiable Disease Management Guidelines – Rickettsial Infections [document on the internet]. Jan 2013 [cited 2013 Apr 13]. Available from: <http://www.health.alberta.ca/documents/Guidelines-Rickettsial-Infections-2013.pdf>

<sup>9</sup> Duncan JH. Rocky Mountain Spotted Fever in Canada. *CMAJ* 1937;37(6):575-577
